# Supplementary material for: Maternal Vitamin D Status and Gestational Weight Gain as Correlates of Neonatal Bone Mass in Healthy Term Breastfed Young Infants from Montreal, Canada
Source: MDPI journal article supplement (doi:10.3390/nu13124189), 2021-11-23
Supplement: s1 [file s1]

## Supplementary material

# Maternal Vitamin D Status and Gestational Weight Gain as Correlates of Neonatal Bone Mass in Healthy Term Breastfed Young Infants from Montreal, Canada

Nathalie Gharibeh <sup>1</sup>, Maryam Razaghi <sup>1</sup>, Catherine A. Vanstone <sup>1</sup>, ShuQin Wei <sup>2</sup>, Dayre McNally <sup>3</sup>, Frank Rauch <sup>4</sup>, Glenville Jones <sup>5</sup>, Martin Kaufmann <sup>5</sup> and Hope A. Weiler <sup>1,6</sup>

<sup>1</sup> School of Human Nutrition, McGill University, Ste-Anne-de-Bellevue, QC H9X 3V9, Canada; nathalie.gharibeh@mail.mcgill.ca (N.G.); maryam.razaghi@mail.mcgill.ca (M.R.); catherine.vanstone@muhc.mcgill.ca (C.A.V.)

<sup>2</sup> Institut National de santé Publique du Québec, Montréal, QC G1V 5B3, Canada; shu-qin.wei@inspq.qc.ca

<sup>3</sup> Department of Pediatrics, Children's Hospital of Eastern Ontario, University of Ottawa, Ottawa, ON K1H 8L1, Canada; dmcnally@cheo.on.ca

<sup>4</sup> Shriners Hospital for Children, Montréal, QC H4A 0A9, Canada; frauch@shriners.mcgill.ca

<sup>5</sup> Department of Biomedical and Molecular Sciences, Queen's University, Kingston, ON K7L 3N6, Canada; gj1@queensu.ca (G.J.); martin.kaufmann@queensu.ca (M.K.)

<sup>6</sup> Nutrition Research Division, Bureau of Nutritional Sciences, Health Products and Food Branch, Health Canada, Ottawa, ON K1A 0K9, Canada

**Table S1.** Maternal nutrient intake from food and supplements during pregnancy according to gestational weight gain categories

|                          | Gestational weight gain       |                              |                              | p-value |
|--------------------------|-------------------------------|------------------------------|------------------------------|---------|
|                          | Inadequate<br>(n=31/35)       | Adequate<br>(n=42/45)        | Excessive<br>(n=51/59)       |         |
| <b>Energy (kcal)</b>     | 2170 ±735<br>1954 (1782-2426) | 2161±952<br>1964 (1508-2744) | 2080±787<br>1831 (1458-2466) | 0.86    |
| <b>Protein (g)</b>       | 98±33<br>87 (80-114)          | 97±45<br>90 (67-114)         | 92±35<br>84 (65-118)         | 0.71    |
| <b>Carbohydrates (g)</b> | 292±134<br>262 (228-310)      | 280±141<br>251 (178-336)     | 270±105<br>252 (186-338)     | 0.74    |
| <b>Fat (g)</b>           | 74±22<br>70 (58-83)           | 79±33<br>72(54-92)           | 76±34<br>66 (50-96)          | 0.80    |
| <b>Vitamin D (IU)</b>    | 615 ± 252<br>593 (503-766)    | 646±285<br>635 (468-809)     | 613±229<br>586 (479-788)     | 0.80    |
| <b>Calcium (mg)</b>      | 1359±426<br>1233 (974-1673)   | 1399±587<br>1289 (943-1695)  | 1364±503<br>1287 (1034-1747) | 0.93    |
| <b>Magnesium (mg)</b>    | 471±152<br>431 (370-548)      | 486±165<br>444 (350-608)     | 476±149<br>459 (351-599)     | 0.91    |
| <b>Phosphorus (mg)</b>   | 1563±519<br>1426 (1197-1898)  | 1571±710<br>1388 (1040-1947) | 1471±578<br>1401(1003-1812)  | 0.69    |

Data are reported as mean±SD and median (IQR). Differences between the means of the different GWG categories were analyzed using mixed linear model accounting for the fixed effect studied.

Distinct letter superscripts (<sup>a,b,c</sup>) indicate statistically significant differences between gestational weight gain categories ( $p<0.05$ , post hoc adjustment); values that share a common superscript are not different from one another.

Abbreviations: IU: international units.

**Table S2.** Correlates of neonatal bone mass tested using mixed linear model analysis

|                                                                                       | Regression coefficients | p-values | 95% CI        |
|---------------------------------------------------------------------------------------|-------------------------|----------|---------------|
| <b>Infant WB BMC g (<math>R^2</math> 0.43, <math>R^2_{adj}</math> 0.42)</b>           |                         |          |               |
| <b>Infant Factors</b>                                                                 |                         |          |               |
| Sex (male; referent: female)                                                          | 5.70                    | 0.0035   | 1.91, 9.48    |
| Age (mo)                                                                              | 16.64                   | <0.0001  | 8.66, 24.62   |
| LAZ                                                                                   | 5.09                    | <0.0001  | 2.94, 7.24    |
| <b>Maternal Factors</b>                                                               |                         |          |               |
| Serum 25(OH)D (<50 nmol/L; referent: $\geq$ 50 nmol/L)                                | 2.96                    | 0.19     | -1.49, 7.40   |
| GWG (insufficient; referent: adequate)                                                | -5.14                   | 0.0010   | -10.22, -0.06 |
| Pre-pregnancy BMI (<25 kg/m <sup>2</sup> ; referent: $\geq$ 25 kg/m <sup>2</sup> )    | 2.43                    | 0.25     | -1.72, 6.59   |
| Self-identified population group (all others; referent: white)                        | 1.92                    | 0.36     | -2.36, 6.19   |
| Education (elementary/high school; referent: university)                              | -1.61                   | 0.13     | -8.36, 5.13   |
| Family yearly income (<70 000 CAD; referent: $\geq$ 70 000 CAD)                       | -1.91                   | 0.0161   | - 6.54, 2.72  |
| <b>Infant WB BMC/weight g/kg (<math>R^2</math> 0.27, <math>R^2_{adj}</math> 0.26)</b> |                         |          |               |
| <b>Infant Factors</b>                                                                 |                         |          |               |
| Sex (male; referent: female)                                                          | 0.25                    | 0.57     | -0.61, 1.12   |
| Age (mo)                                                                              | -3.99                   | <0.0001  | -5.81, -2.16  |
| LAZ                                                                                   | -0.72                   | 0.0044   | -1.21, -0.23  |
| <b>Maternal Factors</b>                                                               |                         |          |               |
| Serum 25(OH)D (<50 nmol/L; referent: $\geq$ 50 nmol/L)                                | 0.82                    | 0.11     | -0.19, 1.84   |
| GWG (insufficient; referent: adequate)                                                | -0.77                   | 0.0002   | -1.93, 0.40   |
| Pre-pregnancy BMI (<25 kg/m <sup>2</sup> ; referent: $\geq$ 25 kg/m <sup>2</sup> )    | 0.50                    | 0.29     | -0.44, 1.45   |
| Self-identified population group (all others; referent: white)                        | 0.01                    | 1.00     | -0.97, 0.99   |
| Education (elementary/high school; referent: university)                              | -0.70                   | 0.0823   | -2.25, 0.84   |
| Family yearly income (<70 000 CAD; referent: $\geq$ 70 000 CAD)                       | -0.28                   | 0.19     | -1.34, 0.78   |
| <b>Infant LS BMC g (<math>R^2</math> 0.28, <math>R^2_{adj}</math> 0.28)</b>           |                         |          |               |
| <b>Infant Factors</b>                                                                 |                         |          |               |
| Sex (male; referent: female)                                                          | -0.06                   | 0.35     | -0.18, 0.06   |
| Age (mo)                                                                              | -0.34                   | 0.0104   | -0.60, -0.08  |
| LAZ                                                                                   | 0.11                    | 0.0024   | 0.04, 0.18    |

|                                                                                              |       |         |              |
|----------------------------------------------------------------------------------------------|-------|---------|--------------|
| <b>Maternal Factors</b>                                                                      |       |         |              |
| Serum 25(OH)D (<50 nmol/L; referent: ≥50 nmol/L)                                             | 0.08  | 0.28    | -0.07, 0.22  |
| GWG (inadequate; referent: adequate)                                                         | -0.07 | 0.0051  | -0.24, 0.09  |
| Pre-pregnancy BMI (<25 kg/m <sup>2</sup> ; referent: ≥25 kg/m <sup>2</sup> )                 | -0.05 | 0.43    | -0.19, 0.08  |
| Self-identified population group (all others; referent: white)                               | -0.02 | 0.79    | -0.16, 0.12  |
| Education (elementary/high school; referent: university)                                     | -0.13 | 0.43    | -0.35, 0.09  |
| Family yearly income (<70 000 CAD; referent: ≥70 000 CAD)                                    | -0.03 | 0.56    | -0.19, 0.12  |
| <b>Infant LS BMD g/cm<sup>2</sup> (R<sup>2</sup> 0.29, R<sup>2</sup><sub>adj</sub> 0.29)</b> |       |         |              |
| <b>Infant Factors</b>                                                                        |       |         |              |
| Sex (male; referent: female)                                                                 | -0.01 | 0.0236  | -0.03, -0.00 |
| Age (mo)                                                                                     | -0.06 | <0.0001 | -0.09, -0.04 |
| LAZ                                                                                          | -0.00 | 0.74    | -0.01, 0.01  |
| <b>Maternal Factors</b>                                                                      |       |         |              |
| Serum 25(OH)D (< 50 nmol/L; referent: ≥50 nmol/L)                                            | 0.01  | 0.21    | -0.01, 0.02  |
| GWG (inadequate; referent: adequate)                                                         | -0.01 | 0.0018  | -0.03, 0.01  |
| Pre-pregnancy BMI (< 25 kg/m <sup>2</sup> ; referent: ≥ 25 kg/m <sup>2</sup> )               | -0.00 | 0.69    | -0.02, 0.01  |
| Self-identified population group as (all others; referent: white)                            | -0.01 | 0.28    | -0.02, 0.01  |
| Education (elementary/high school; referent: university)                                     | -0.01 | 0.38    | -0.04, 0.01  |
| Family yearly income (<70 000 CAD; referent: ≥70 000 CAD)                                    | 0.00  | 0.82    | -0.01, 0.02  |

Data are regression coefficients (95% CI) calculated using mixed linear model accounting for the fixed effects of infant's sex, age, and LAZ-score and mother's 25(OH)D categories, pre-pregnancy BMI categories, gestational weight gain categories, education, self-reported population group as well as family income.

Abbreviations: WB BMC: whole body bone mineral content, LAZ: length-for-age z-score, 25(OH)D: 25-hydroxyvitamin D, GWG: gestational weight gain, CAD: Canadian dollars, WB BMC/kg: whole body bone mineral content per kilogram body weight, LS BMC: lumbar spine bone mineral content, and LS BMD: lumbar spine bone mineral density.

**Table S3.** Correlates of neonatal bone mass tested using mixed linear model analysis

|                                                                                       | Regression coefficients | <i>p</i> -values | 95% CI       |
|---------------------------------------------------------------------------------------|-------------------------|------------------|--------------|
| <b>Infant WB BMC g (<math>R^2</math> 0.42, <math>R^2_{adj}</math> 0.42)</b>           |                         |                  |              |
| <b>Infant Factors</b>                                                                 |                         |                  |              |
| Sex (male; referent: female)                                                          | 5.57                    | 0.0043           | 1.78, 9.36   |
| Age (mo)                                                                              | 18.63                   | <0.0001          | 10.67, 26.58 |
| LAZ                                                                                   | 5.67                    | <0.0001          | 3.60, 7.74   |
| <b>Maternal Factors</b>                                                               |                         |                  |              |
| Serum 25(OH)D (per each nmol/L)                                                       | -0.04                   | 0.32             | -0.12, 0.04  |
| GWG (per each kg)                                                                     | 0.64                    | 0.0005           | 0.29, 0.99   |
| Pre-pregnancy BMI (per each kg/m <sup>2</sup> )                                       | 0.39                    | 0.0778           | -0.04, 0.82  |
| Self-identified population group (all others; referent: white)                        | 2.47                    | 0.26             | -1.83, 6.78  |
| Education (elementary/high school; referent: university)                              | -1.41                   | 0.16             | -8.11, 5.30  |
| Family yearly income (<70 000 CAD; referent: ≥70 000 CAD)                             | -2.34                   | 0.0051           | -6.99, 2.30  |
| <b>Infant WB BMC/weight g/kg (<math>R^2</math> 0.26, <math>R^2_{adj}</math> 0.25)</b> |                         |                  |              |
| <b>Infant Factors</b>                                                                 |                         |                  |              |
| Sex (male; referent: female)                                                          | 0.20                    | 0.65             | -0.67, 1.07  |
| Age (mo)                                                                              | -3.51                   | 0.0002           | -5.33, -1.68 |
| LAZ                                                                                   | -0.57                   | 0.0174           | -1.05, -0.10 |
| <b>Maternal Factors</b>                                                               |                         |                  |              |
| Serum 25(OH)D (per each nmol/L)                                                       | -0.01                   | 0.20             | -0.03, 0.01  |
| GWG (per each kg)                                                                     | 0.16                    | 0.0001           | 0.08, 0.24   |
| Pre-pregnancy BMI (per each kg/m <sup>2</sup> )                                       | 0.09                    | 0.07             | -0.01, 0.19  |
| Self-identified population group (all others; referent: white)                        | 0.14                    | 0.78             | -0.85, 1.13  |
| Education (elementary/high school; referent: university)                              | -0.63                   | 0.10             | -2.17, 0.90  |
| Family yearly income (<70 000 CAD; referent: ≥70 000 CAD)                             | -0.35                   | 0.08             | -1.41, 0.72  |
| <b>Infant LS BMC g (<math>R^2</math> 0.28, <math>R^2_{adj}</math> 0.27)</b>           |                         |                  |              |
| <b>Infant Factors</b>                                                                 |                         |                  |              |
| Sex (male; referent: female)                                                          | -0.06                   | 0.33             | -0.18, 0.06  |
| Age (mo)                                                                              | -0.29                   | 0.0289           | -0.55, -0.03 |
| LAZ                                                                                   | 0.13                    | 0.0002           | 0.06, 0.20   |

|                                                                                              |         |         |                 |
|----------------------------------------------------------------------------------------------|---------|---------|-----------------|
| <b>Maternal Factors</b>                                                                      |         |         |                 |
| Serum 25(OH)D (per each nmol/L)                                                              | -0.0002 | 0.85    | -0.003, 0.002   |
| GWG (per each kg)                                                                            | 0.02    | 0.0031  | 0.01, 0.02      |
| Pre-pregnancy BMI (per each kg/m <sup>2</sup> )                                              | 0.02    | 0.0045  | 0.01, 0.03      |
| Self-identified population group (all others; referent: white)                               | 0.01    | 0.85    | -0.13, 0.15     |
| Education (elementary/high school; referent: university)                                     | -0.13   | 0.43    | -0.34, 0.09     |
| Family yearly income (<70 000 CAD; referent: ≥70 000 CAD)                                    | -0.04   | 0.34    | -0.19, 0.12     |
| <b>Infant LS BMD g/cm<sup>2</sup> (R<sup>2</sup> 0.30, R<sup>2</sup><sub>adj</sub> 0.29)</b> |         |         |                 |
| <b>Infant Factors</b>                                                                        |         |         |                 |
| Sex (male; referent: female)                                                                 | -0.02   | 0.0201  | -0.03, 0.00     |
| Age (mo)                                                                                     | -0.06   | <0.0001 | -0.08, -0.03    |
| LAZ                                                                                          | -0.001  | 0.83    | -0.006, 0.008   |
| <b>Maternal Factors</b>                                                                      |         |         |                 |
| Serum 25(OH)D (per each nmol/L)                                                              | 0.00004 | 0.75    | -0.0003, 0.0002 |
| GWG (per each kg)                                                                            | 0.002   | 0.0005  | 0.001, 0.003    |
| Pre-pregnancy BMI (per each kg/m <sup>2</sup> )                                              | 0.002   | 0.0034  | 0.001, 0.002    |
| Self-identified population group as (all others; referent: white)                            | -0.004  | 0.58    | -0.019, 0.010   |
| Education (elementary/high school; referent: university)                                     | -0.01   | 0.38    | -0.04, 0.01     |
| Family yearly income (<70 000 CAD; referent: ≥70 000 CAD)                                    | 0.003   | 0.63    | -0.013, 0.019   |

Data are regression coefficients (95% CI) calculated using mixed linear model accounting for the fixed effects of infant's sex, age, and LAZ-score and mother's 25(OH)D concentration, pre-pregnancy BMI, gestational weight gain, education, self-reported population group as well as family income.

Abbreviations: WB BMC: whole body bone mineral content, LAZ: length-for-age z-score, 25(OH)D: 25-hydroxyvitamin D, GWG: gestational weight gain, CAD: Canadian dollars, WB BMC/kg: whole body bone mineral content per kilogram body weight, LS BMC: lumbar spine bone mineral content, and LS BMD: lumbar spine bone mineral density.

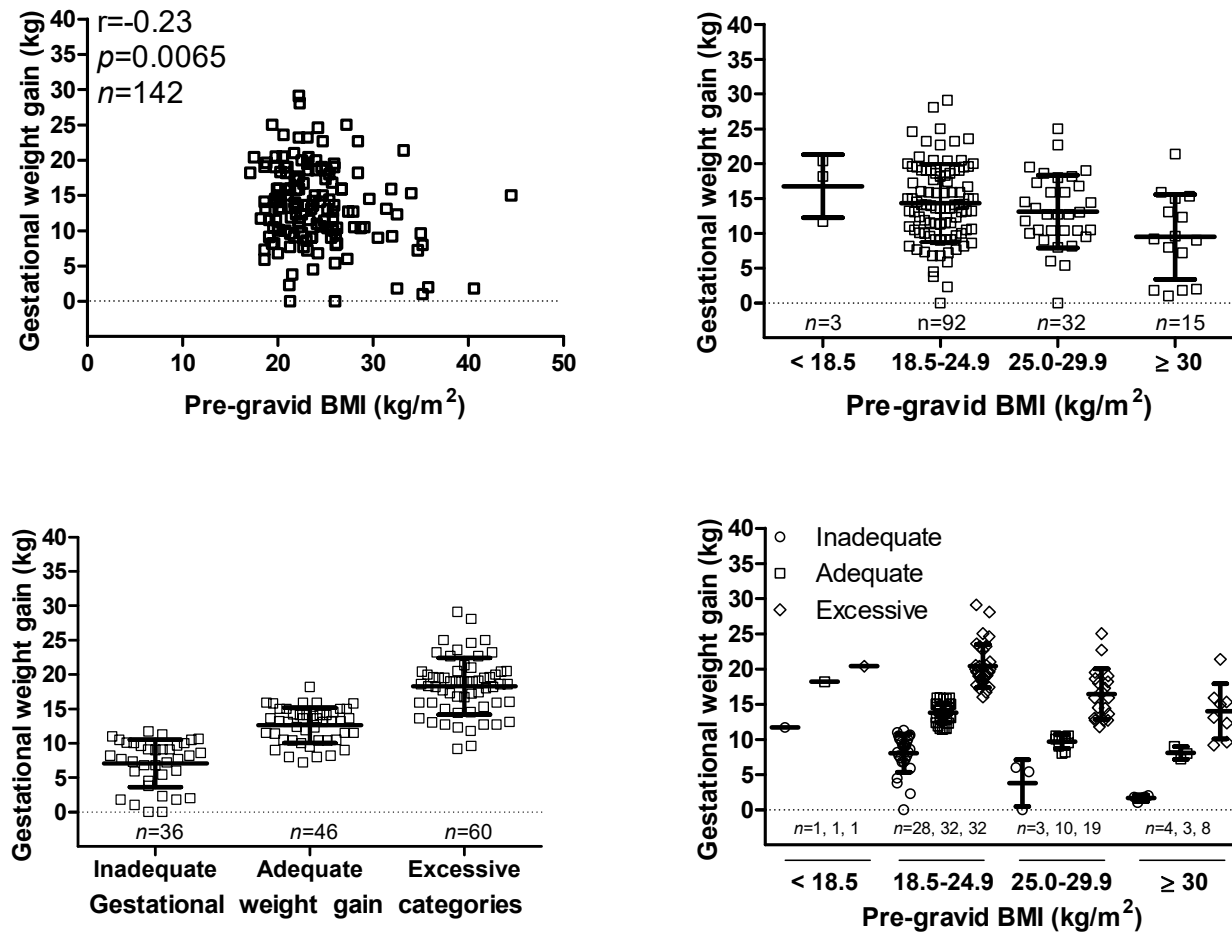

**Figure S1. Gestational weight gain relative to pre-gravid BMI expressed as continuous data and according to recommended categories.** Data are reported as mean  $\pm$  SD. Data were analyzed using Pearson correlation for gestational weight gain (kg) according to pre-gravid BMI (kg/m<sup>2</sup>). Pregnancy weight gain (kg) is descriptively shown relative to pre-gravid BMI categories and expressed as inadequate, adequate or excessive according to pre-gravid BMI categories.
